# Supplementary material for: Development of a nucleoside-modified mRNA vaccine against clade 2.3.4.4b H5 highly pathogenic avian influenza virus
Source: PubMed Central journal article supplement (PMC11116520; doi:10.1038/s41467-024-48555-z), 2024-05-23
Supplement: 41467_2024_48555_MOESM1_ESM.pdf [file 41467_2024_48555_MOESM1_ESM.pdf]

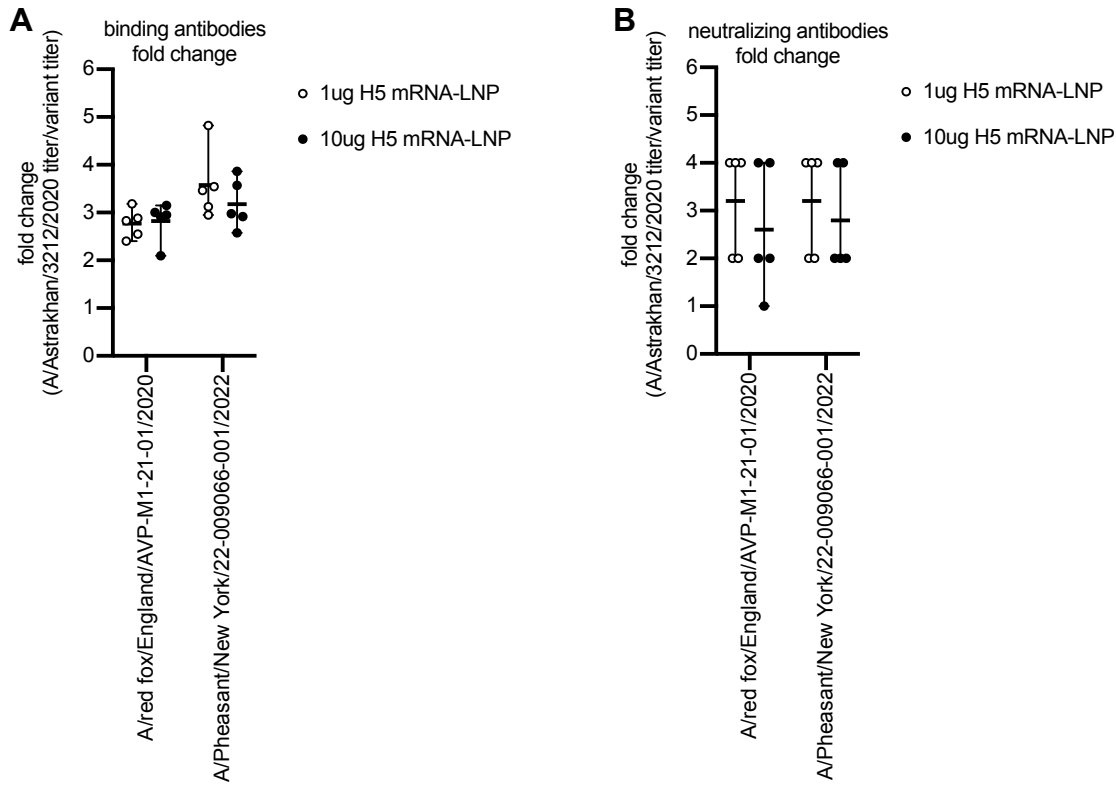

**Supplementary Figure 1. Comparison of murine antibody titers against different Clade 2.3.4.4b H5 antigens.** Serum samples were collected from mice 28 days after vaccination. ELISA binding and neutralization titers are reported in **Figures 1-2**. Fold change was determined by dividing antibody titers obtained using A/Astrakhan/3212/2020 antigens with titers obtained using either A/red fox/England/AVP-M1-21-01/2020 or A/pheasant/New York/22-009066-001/2022 antigens. Shown are fold change for (A) ELISA binding and (B) neutralization titers. Shown are mean and range. n=5 mice/group

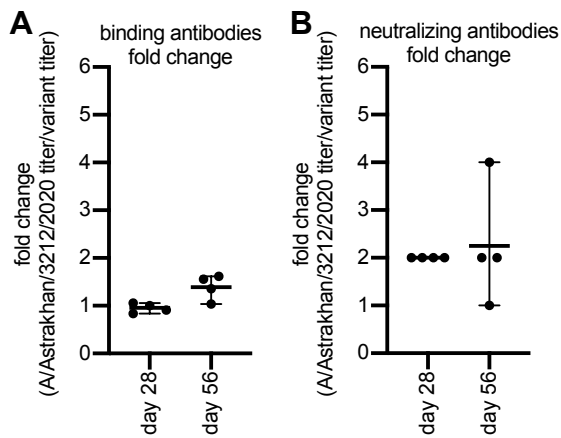

**Supplementary Figure 2. Comparison of ferret antibody titers against different Clade 2.3.4.4b H5 antigens.** Serum samples were collected from ferrets 28 and 56 days after vaccination. ELISA binding and neutralization titers are reported in **Figure 6**. Fold change was determined by dividing antibody titers obtained using A/Astrakhan/3212/2020 antigens with titers obtained using A/pheasant/New York/22-009066-001/2022 antigens. Shown are fold change for (A) ELISA binding and (B) neutralization titers. Shown are mean and range. n=4 ferrets/group
